# Supplementary material for: Life cycle analysis (LCA) and economic evaluation of catalytic fast pyrolysis: implication of co-product's end-usage, catalyst type, and process parameters
Source: Royal Society of Chemistry journal article supplement (doi:10.1039/d2se00079b), 2022-01-01
Supplement: d2se00079b1.pdf [file d2se00079b1.pdf]

**Life cycle analysis (LCA) and economic evaluation of catalytic fast pyrolysis: Implication of co-product's end-usage, catalyst type, and process parameters**

Shubhi Gupta, Pushpraj Patel, Prasenjit Mondal\*

*Department of Chemical Engineering, Indian Institute of Technology Roorkee, Roorkee,  
Uttarakhand 247667, India*

\*Corresponding author: Dr. Prasenjit Mondal, Professor, Department of Chemical Engineering,  
Indian Institute of Technology Roorkee, Roorkee (Uttarakhand) India 247667 Phone: +91-1332-  
285181; Fax: +91-1332-276535

Email: [prasenjit.mondal@ch.iitr.ac.in](mailto:prasenjit.mondal@ch.iitr.ac.in)\*

**S1. Bio-oil combustion**

Bio-oil produced from pyrolysis is combusted to provide energy to the end-user.

*Assumptions:*

1. Atmospheric air comprising of 21% oxygen and 79% nitrogen was used during combustion.
2. 50% excess air was utilized to ensure complete oxidation.
3. All the nitrogen contained in combustion air is inert and only bio-oil based nitrogen goes to NO<sub>x</sub>.
4. Nitrogen (N) in bio-oil goes to NO and NO<sub>2</sub>.

5. Only 5-10% NO<sub>2</sub> is formed in comparison to NO (NO<sub>2</sub>/NO = 10% (assumed)).
6. Sulfur (S) in bio-oil completely converts to SO<sub>2</sub>.

*Reaction:*

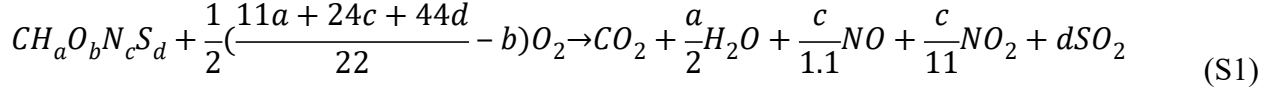

*Calculation of gaseous emissions:*

Suppose M is bio-oil molecular weight and m is the mass of bio-oil (in kg).

$$CO_2 \text{ produced during bio-oil combustion} = 44 * \frac{m}{M}$$

$$H_2O \text{ produced during bio-oil combustion} = \frac{a}{2} * 18 * \frac{m}{M}$$

$$NO \text{ produced during bio-oil combustion} = \frac{c}{1.1} * 30 * \frac{m}{M}$$

$$NO_2 \text{ produced during bio-oil combustion} = \frac{c}{11} * 46 * \frac{m}{M}$$

$$SO_2 \text{ produced during bio-oil combustion} = d * 64 * \frac{m}{M}$$

$$O_2 \text{ fed inside the combustor (50\% excess)} = \frac{1}{2} \left( \frac{11a + 24c + 44d}{22} - b \right) * 32 * \frac{m}{M} * 1.5$$

$$N_2 \text{ present inside combustion air} = \frac{1}{2} \left( \frac{11a + 24c + 44d}{22} - b \right) * 32 * \frac{m}{M} * 1.5 * \frac{79}{21} * \frac{28}{32}$$

Air fed for bio-oil combustion =

$$\left\{ \left[ \frac{1}{2} \left( \frac{11a + 24c + 44d}{22} - b \right) * 32 * \frac{m}{M} * 1.5 \right] + \left[ \frac{1}{2} \left( \frac{11a + 24c + 44d}{22} - b \right) * 32 * \frac{m}{M} * 1.5 * \frac{79}{21} * \frac{28}{32} \right] \right\}$$

(S2)

O<sub>2</sub> unreacted = Total O<sub>2</sub> fed to the combustor - O<sub>2</sub> reacted

Total flue gas produced = CO<sub>2</sub> + H<sub>2</sub>O + NO + NO<sub>2</sub> + SO<sub>2</sub> + O<sub>2</sub> + N<sub>2</sub> (S3)

Energy provided for preheating air =

$$\left\{ \left[ \frac{1}{2} \left( \frac{11a + 24c + 44d}{22} - b \right) * 32 * \frac{m}{M} * 1.5 \right] + \left[ \frac{1}{2} \left( \frac{11a + 24c + 44d}{22} - b \right) * 32 * \frac{m}{M} * 1.5 * \frac{79}{21} * \frac{28}{32} \right] \right\} * 1.005 * (500 - 25)$$

(S4)

Bio-oil LHV have been calculated by using eqn (S5).<sup>1</sup>

$$LHV \text{ (in MJ/kg)} = HHV - 0.212H - 0.0245M - 0.008Y \quad (S5)$$

Where, LHV is the low heating value of bio-oil (in MJ/kg)

HHV is the high heating value of bio-oil (in MJ/kg)

H is the hydrogen content in bio-oil (in wt.%).

M is moisture content in bio-oil (in wt.%).

Y is the oxygen content in bio-oil (in wt.%).

Elemental composition and high heating value (HHV) of bio-oil is being adopted from past literature.<sup>2,3</sup>

Then, total energy released from bio-oil combustion = bio-oil produced (in kg) \* bio-oil LHV (in MJ/kg). (S6)

## **S2. Biochar combustion**

Different percentage of biochar was combusted in different scenarios to provide process energy.

*Assumptions:*

1. Atmospheric air comprising of 21% oxygen and 79% nitrogen was used during combustion.
2. 50% excess air was utilized to ensure complete oxidation.
3. All the nitrogen contained in combustion air is inert and only biochar-based nitrogen goes to NO<sub>x</sub>.
4. Nitrogen (N) in biochar goes to NO and NO<sub>2</sub>.
5. Only 5-10% NO<sub>2</sub> is formed in comparison to NO (NO<sub>2</sub>/NO = 10% (assumed)).
6. Sulfur (S) in biochar completely converts to SO<sub>2</sub>.

*Reaction:*

$$CH_aO_bN_cS_d + \frac{1}{2} \left( \frac{11a + 24c + 44d}{22} - b \right) O_2 \rightarrow CO_2 + \frac{a}{2} H_2O + \frac{c}{1.1} NO + \frac{c}{11} NO_2 + dSO_2 \quad (S7)$$

*Calculation of gaseous emissions:*

Suppose M is biochar molecular weight and m is the mass of biochar (in kg).

$$CO_2 \text{ produced during biochar combustion} = 44 * \frac{m}{M}$$

$$H_2O \text{ produced during biochar combustion} = \frac{a}{2} * 18 * \frac{m}{M}$$

$$NO \text{ produced during biochar combustion} = \frac{c}{1.1} * 30 * \frac{m}{M}$$

$$NO_2 \text{ produced during biochar combustion} = \frac{c}{11} * 46 * \frac{m}{M}$$

$$SO_2 \text{ produced during biochar combustion} = d * 64 * \frac{m}{M}$$

$$O_2 \text{ fed inside the combustor (50\% excess)} = \frac{1}{2} \left( \frac{11a + 24c + 44d}{22} - b \right) * 32 * \frac{m}{M} * 1.5$$

$$N_2 \text{ present inside combustion air} = \frac{1}{2} \left( \frac{11a + 24c + 44d}{22} - b \right) * 32 * \frac{m}{M} * 1.5 * \frac{79}{21} * \frac{28}{32}$$

$$\begin{aligned} \text{Air fed for biochar combustion} = \\ \left\{ \left[ \frac{1}{2} \left( \frac{11a + 24c + 44d}{22} - b \right) * 32 * \frac{m}{M} * 1.5 \right] + \left[ \frac{1}{2} \left( \frac{11a + 24c + 44d}{22} - b \right) * 32 * \frac{m}{M} * 1.5 * \frac{79}{21} * \frac{28}{32} \right] \right\} \end{aligned}$$

(S8)

$O_2 \text{ unreacted} = \text{Total } O_2 \text{ fed to the combustor} - O_2 \text{ reacted}$

$$\text{Total flue gas produced} = CO_2 + H_2O + NO + NO_2 + SO_2 + O_2 + N_2 \quad (S9)$$

Energy provided for preheating air =

$$\left\{ \left[ \frac{1}{2} \left( \frac{11a + 24c + 44d}{22} - b \right) * 32 * \frac{m}{M} * 1.5 \right] + \left[ \frac{1}{2} \left( \frac{11a + 24c + 44d}{22} - b \right) * 32 * \frac{m}{M} * 1.5 * \frac{79}{21} * \frac{28}{32} \right] \right\} * 1.005 * (500 - 25)$$

(S10)

Biochar LHV was utilized for calculating energy released during combustion, which has been calculated from the following well established correlation (eqn (S11)): <sup>4</sup>

$$LHV \text{ (MJ/kg)} = HHV * (1 - w/100) - (w/100) * 2.444 - 2.444 * (h/100) * 8.936 * (1 - w/100) \quad (S11)$$

Where, LHV is lower heating value (in MJ/kg).

HHV is higher heating value (in MJ/kg).

w is the moisture percentage in biochar (in wt.%).

h is the hydrogen percentage in biochar (in wt.%).

Biochar composition (both ultimate and proximate) and HHV has been taken from the previous studies on the same biomass. <sup>5</sup>

Then, total energy released from biochar combustion = biochar combusted (in kg) \* biochar LHV (in MJ/kg). (S12)

### S3. Non-condensable gas combustion

NCG released during pyrolysis were combusted to provide energy to the process. NCG composed of CO, CO, CH<sub>4</sub> and H<sub>2</sub>, out of which CO, CH<sub>4</sub> and H<sub>2</sub> are combustible, and CO<sub>2</sub> is non-combustible.

Assumptions:

1. Atmospheric air comprising of 21% oxygen and 79% nitrogen was used during combustion.
2. 50% excess air was provided for ensuring complete combustion to occur.
3. CO is assumed to be negligible in exhaust gas due to the occurrence of complete oxidation in the presence of excess air.
4. N<sub>2</sub> is inert and doesn't react to NO<sub>x</sub>

Reactions:

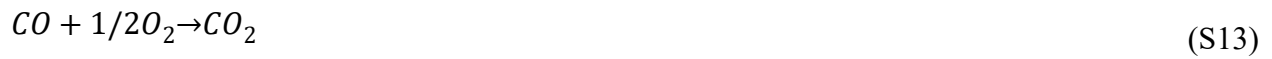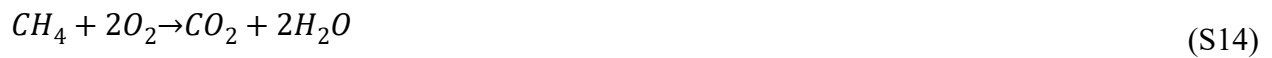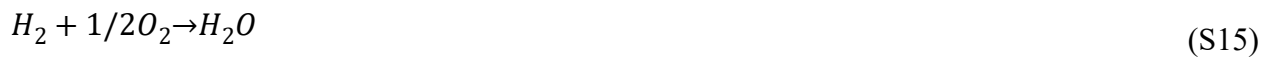

Composition (in mol%) of NCG released during non-catalytic, Al<sub>2</sub>O<sub>3</sub> catalyzed and Ni/Al<sub>2</sub>O<sub>3</sub> catalyzed pyrolysis has been appended below (based on our previous lab-scale studies): <sup>2,3</sup>

**Table S1** Composition of NCG (in mol%) evolved from non-catalytic, Al<sub>2</sub>O<sub>3</sub> catalyzed and Ni/Al<sub>2</sub>O<sub>3</sub> catalyzed pyrolysis. <sup>2,3</sup>

|                       | <b>Non-catalytic</b> | <b>Al<sub>2</sub>O<sub>3</sub> catalyzed</b> | <b>Ni/Al<sub>2</sub>O<sub>3</sub> catalyzed</b> |
|-----------------------|----------------------|----------------------------------------------|-------------------------------------------------|
|                       | <b>pyrolysis</b>     | <b>pyrolysis</b>                             | <b>pyrolysis</b>                                |
| <b>CO<sub>2</sub></b> | 46.12                | 40.06                                        | 33.54                                           |
| <b>CO</b>             | 31.66                | 34.41                                        | 37.10                                           |
| <b>CH<sub>4</sub></b> | 12.37                | 13.57                                        | 14.62                                           |
| <b>H<sub>2</sub></b>  | 9.85                 | 11.96                                        | 14.74                                           |

Amount of flue gases produced during NCG combustion can be calculated using reactions (S13-S15) occurred during combustion process and composition of NCG (Table S1) (as given above).

$$\text{Amount of air fed to the combustor} = \frac{29}{32} * \frac{1}{0.21} * O_2 \text{ required (50\% excess)}$$

(S16)

Energy released during combustion is dependent on the fuel lower heating value (LHV), which has been calculated by using the following correlation: <sup>6</sup>

$$LHV (MJ/Nm^3) = 0.001(126.36 * CO + 107.98 * H_2 + 358.18 * CH_4)$$

(S17)

Density of non-condensable gases can be predicted from its mass fraction composition using eqn (S18):

$$\text{Density} \left( \frac{kg}{Nm^3} \right) = \dot{m}_{CO_2} * \rho_{CO_2} + \dot{m}_{CO} * \rho_{CO} + \dot{m}_{CH_4} * \rho_{CH_4} + \dot{m}_{H_2} * \rho_{H_2}$$

(S18)



Energy required (in MJ) to preheat air to combustion temperature of NCG =  $m \cdot 1.005 \cdot (600 - 25)$   
(S19)

Where, m represents the total amount of NCG combusted in kg.

Total energy released during combustion = LHV (MJ/kg) \* m (kg) (S20)

Table S2 depicts the attributes of NCG combustion calculated for all 3 processes.

**Table S2** Different attributes of NCG combustion from non-catalytic, Al<sub>2</sub>O<sub>3</sub> catalyzed and Ni/Al<sub>2</sub>O<sub>3</sub> catalyzed pyrolysis (for functional unit of 1 MJ energy production from bio-oil).

|                                                  | Non-catalytic<br>pyrolysis | Al <sub>2</sub> O <sub>3</sub> catalyzed<br>pyrolysis | Ni/Al <sub>2</sub> O <sub>3</sub> catalyzed<br>pyrolysis |
|--------------------------------------------------|----------------------------|-------------------------------------------------------|----------------------------------------------------------|
| <b>LHV (MJ/kg)</b>                               | 6.260                      | 7.119                                                 | 8.077                                                    |
| <b>Pre-heating energy<br/>required (MJ)</b>      | 0.0349                     | 0.0455                                                | 0.0444                                                   |
| <b>Total combustion<br/>energy released (MJ)</b> | 0.126                      | 0.160                                                 | 0.151                                                    |
| <b>Air fed (Nm<sup>3</sup>)</b>                  | 0.0501                     | 0.0654                                                | 0.0368                                                   |
| <b>Exhaust released (kg)</b>                     | 0.0804                     | 0.101                                                 | 0.0956                                                   |

#### S4. Condenser 1 and 2

Specific heat capacity of NCG,  $C_{p,NCG} =$

$$\dot{m}_{CO2} * C_{p, CO2} + \dot{m}_{CO} * C_{p, CO} + \dot{m}_{CH4} * C_{p, CH4} + \dot{m}_{H2} * C_{p, H2}$$

(S21)

Specific heat capacity of bio-oil <sup>7</sup>,  $C_{p,bio-oil} = 2.435 \text{ kJ/kg K}$  (S22)

Specific heat capacity of bio-oil,  $C_{p,volatiles} = \dot{m}_{bio-oil} * C_{p, bio-oil} + \dot{m}_{NCG} * C_{p, NCG}$

(S23)

Total heat of condensation of volatiles  $= m_{volatiles} * C_{p,volatiles} * (550-25)$  (S24)

Applying energy balance on condenser:

$$m_{volatiles} * C_{p,volatiles} * (550-25) = m_{water} * C_{p,water} * (T_{water, out} - T_{water, in})$$

(S25)

Using eqn (S25), mass of condensation water ( $m_{water}$ ) can be calculated for a given amount of volatiles and inlet and outlet water temperature.

**Table S3** Inventory input-output data utilized for LCA of non-catalytic pyrolysis in the 4 different scenarios.

|                                                          | Scenario 1  | Scenario 2  | Scenario 3  | Scenario 4  | Remarks                    |
|----------------------------------------------------------|-------------|-------------|-------------|-------------|----------------------------|
| <b>Functional unit</b>                                   | 1 MJ energy | 1 MJ energy | 1 MJ energy | 1 MJ energy |                            |
|                                                          | produced    | produced    | produced    | produced    |                            |
| <b>Inputs</b>                                            |             |             |             |             |                            |
| Pine needles (kg)                                        | 0.117       | 0.117       | 0.117       | 0.117       |                            |
| DE: Diesel mix at refinery (biomass transportation) (kg) | 0.00046     | 0.00046     | 0.00046     | 0.00046     | Ecoinvent 3.8 <sup>a</sup> |
| DE: Thermal energy from natural gas (drying) (MJ)        | 0.0256      | 0.0256      | 0.0256      | 0.0256      | 4                          |
| DE: Electricity grid mix (chopping) (MJ)                 | 0.00287     | 0.00287     | 0.00287     | 0.00287     | 8,9                        |
| DE: Electricity grid mix (grinding) (MJ)                 | 0.0204      | 0.0204      | 0.0204      | 0.0204      | 10                         |
| DE: Thermal energy from natural gas (pyrolysis) (MJ)     | 0.543       | 0.417       | 0.17        | -           | 11–13                      |
| DE: Tap water from groundwater (condenser 1) (kg)        | 0.211       | 0.211       | 0.211       | 0.211       | Using eqn (S25)            |

|                                                                  |          |          |          |          |                            |
|------------------------------------------------------------------|----------|----------|----------|----------|----------------------------|
| DE: Tap water from groundwater (condenser<br>2) (kg)             | 0.0705   | 0.0705   | 0.0705   | 0.0705   | Using eqn (S25)            |
| DE: Diesel mix at refinery (bio-oil<br>transportation) (kg)      | 0.000212 | 0.000212 | 0.000212 | 0.000212 | Ecoinvent 3.8 <sup>a</sup> |
| DE: Thermal energy from natural gas (bio-oil<br>combustion) (MJ) | 0.255    | 0.255    | 0.255    | 0.116    | Using eqn (S4)             |
| GLO: Air (bio-oil combustion) (Nm <sup>3</sup> )                 | 0.443    | 0.443    | 0.443    | 0.443    | Using eqn (S2)             |
| DE: Thermal energy from natural gas (NCG<br>combustion) (MJ)     | -        | 0.0349   | 0.0349   | 0.0349   | Using eqn (S19)            |
| GLO: Air (NCG combustion) (Nm <sup>3</sup> )                     | -        | 0.0501   | 0.0501   | 0.0501   | Using eqn (S16)            |
| GLO: Air (biochar combustion) (Nm <sup>3</sup> )                 | -        | -        | 0.147    | 0.331    | Using eqn (S8)             |
| <b>Output</b>                                                    |          |          |          |          |                            |
| Biochar (kg)                                                     | 0.0316   | -        | -        | -        | 2                          |
| Non-condensable gases (NCG) (kg)                                 | 0.0201   | -        | -        | -        | 2                          |
| Off-gases (bio-oil combustion) (kg)                              | 0.587    | 0.587    | 0.587    | 0.587    | Using eqn (S3)             |
| Off-gases (NCG combustion) (kg)                                  | -        | 0.0804   | 0.0804   | 0.0804   | Using eqn (S13-15)         |

|                                     |   |        |        |         |                |
|-------------------------------------|---|--------|--------|---------|----------------|
|                                     |   |        |        |         | and Table S1   |
| Off-gases (biochar combustion) (kg) | - | -      | 0.191  | 0.431   | Using eqn (S9) |
| Biochar to coal credit (kg)         | - | 0.0316 | 0.0189 | 0.00316 | Table 1        |

<sup>a</sup> GLO, Truck (diesel driven), Euro 6, up to 7.5t gross weight and 2.7t payload capacity.

**Table S4** Inventory input-output data utilized for LCA of Al<sub>2</sub>O<sub>3</sub> catalyzed pyrolysis in the 4 different scenarios.

|                                                          | Scenario 1  | Scenario 2  | Scenario 3  | Scenario 4  | Remarks                    |
|----------------------------------------------------------|-------------|-------------|-------------|-------------|----------------------------|
| <b>Functional unit</b>                                   | 1 MJ energy | 1 MJ energy | 1 MJ energy | 1 MJ energy |                            |
|                                                          | produced    | produced    | produced    | produced    |                            |
| <b>Inputs</b>                                            |             |             |             |             |                            |
| Pine needles (kg)                                        | 0.116       | 0.116       | 0.116       | 0.116       |                            |
| DE: Diesel mix at refinery (biomass transportation) (kg) | 0.000453    | 0.000453    | 0.000453    | 0.000453    | Ecoinvent 3.8 <sup>a</sup> |
| DE: Thermal energy from natural gas (drying)             | 0.0252      | 0.0252      | 0.0252      | -           | 4                          |

|                                                                  |          |          |          |          |                            |
|------------------------------------------------------------------|----------|----------|----------|----------|----------------------------|
| (MJ)                                                             |          |          |          |          |                            |
| DE: Electricity grid mix (chopping) (MJ)                         | 0.00283  | 0.00283  | 0.00283  | 0.00283  | 8,9                        |
| DE: Electricity grid mix (grinding) (MJ)                         | 0.02     | 0.02     | 0.02     | 0.02     | 10                         |
| DE: Thermal energy from natural gas<br>(pyrolysis) (MJ)          | 0.534    | 0.374    | 0.166    | -        | 11–13                      |
| EU: Alumina (Al <sub>2</sub> O <sub>3</sub> ) (catalyst) (kg)    | 0.104    | 0.104    | 0.104    | 0.104    | Ecoinvent 3.8 <sup>b</sup> |
| DE: Tap water from groundwater (condenser<br>1) (kg)             | 0.208    | 0.208    | 0.208    | 0.208    | Using eqn (S25)            |
| DE: Tap water from groundwater (condenser<br>2) (kg)             | 0.0694   | 0.0694   | 0.0694   | 0.0694   | Using eqn (S25)            |
| DE: Diesel mix at refinery (bio-oil<br>transportation) (kg)      | 0.000198 | 0.000198 | 0.000198 | 0.000198 | Ecoinvent 3.8 <sup>a</sup> |
| DE: Thermal energy from natural gas (bio-oil<br>combustion) (MJ) | 0.253    | 0.253    | 0.253    | 0.166    | Using eqn (S4)             |
| GLO: Air (bio-oil combustion) (Nm <sup>3</sup> )                 | 0.44     | 0.44     | 0.44     | 0.44     | Using eqn (S2)             |
| DE: Thermal energy from natural gas (NCG)                        | -        | 0.0455   | 0.0115   | -        | Using eqn (S19)            |

|                                                  |        |        |        |        |                                     |
|--------------------------------------------------|--------|--------|--------|--------|-------------------------------------|
| combustion) (MJ)                                 |        |        |        |        |                                     |
| GLO: Air (NCG combustion) (Nm <sup>3</sup> )     | -      | 0.0654 | 0.0654 | 0.0654 | Using eqn (S16)                     |
| GLO: Air (biochar combustion) (Nm <sup>3</sup> ) | -      | -      | 0.144  | 0.325  | Using eqn (S8)                      |
| <b>Output</b>                                    |        |        |        |        |                                     |
| Biochar (kg)                                     | 0.031  | -      | -      | -      | 3                                   |
| Non-condensable gases (NCG) (kg)                 | 0.0225 | -      | -      | -      | 3                                   |
| Off-gases (bio-oil combustion) (kg)              | 0.581  | 0.581  | 0.581  | 0.581  | Using eqn (S3)                      |
| Off-gases (NCG combustion) (kg)                  | -      | 0.101  | 0.101  | 0.101  | Using eqn (S13-<br>15) and Table S1 |
| Off-gases (biochar combustion) (kg)              | -      | -      | 0.188  | 0.423  | Using eqn (S9)                      |
| Biochar to coal credit (kg)                      | -      | 0.031  | 0.0186 | 0.0031 | Table 1                             |

<sup>a</sup> GLO, Truck (diesel driven), Euro 6, up to 7.5t gross weight and 2.7t payload capacity.

<sup>b</sup> EU-28, Alumina production 2015, production of smelter grade alumina, single route, at plant (3.94 g/cm<sup>3</sup>).

**Table S5** Inventory input-output data utilized for LCA of Ni/Al<sub>2</sub>O<sub>3</sub> catalyzed pyrolysis in the 4 different scenarios.

|                                                                 | Scenario 1  | Scenario 2  | Scenario 3  | Scenario 4  | Remarks                    |
|-----------------------------------------------------------------|-------------|-------------|-------------|-------------|----------------------------|
| <b>Functional unit</b>                                          | 1 MJ energy | 1 MJ energy | 1 MJ energy | 1 MJ energy |                            |
|                                                                 | produced    | produced    | produced    | produced    |                            |
| <b>Inputs</b>                                                   |             |             |             |             |                            |
| Pine needles (kg)                                               | 0.0863      | 0.0863      | 0.0863      | 0.0863      |                            |
| DE: Diesel mix at refinery (biomass transportation) (kg)        | 0.000338    | 0.000338    | 0.000338    | 0.000338    | Ecoinvent 3.8 <sup>a</sup> |
| DE: Thermal energy from natural gas (drying) (MJ)               | 0.0188      | 0.0188      | 0.0188      | 0.0112      | 4                          |
| DE: Electricity grid mix (chopping) (MJ)                        | 0.00211     | 0.00211     | 0.00211     | 0.00211     | 8,9                        |
| DE: Electricity grid mix (grinding) (MJ)                        | 0.015       | 0.015       | 0.015       | 0.015       | 10                         |
| DE: Thermal energy from natural gas (pyrolysis) (MJ)            | 0.399       | 0.247       | 0.124       | -           | 11–13                      |
| EU: Alumina (Al <sub>2</sub> O <sub>3</sub> ) (catalyst) (kg)   | 0.0706      | 0.0706      | 0.0706      | 0.0706      | Ecoinvent 3.8 <sup>b</sup> |
| DE: Water (desalinated; deionised) (catalyst impregnation) (kg) | 0.706       | 0.706       | 0.706       | 0.706       | 3                          |



|                                                                  |          |          |          |          |                                  |
|------------------------------------------------------------------|----------|----------|----------|----------|----------------------------------|
| DE: Electricity grid mix (catalyst<br>impregnation) (MJ)         | 0.0224   | 0.0224   | 0.0224   | 0.0224   | Using instrument<br>power rating |
| DE: Thermal energy from natural gas<br>(catalyst drying) (MJ)    | 0.0373   | 0.0373   | 0.0373   | 0.0373   | Using instrument<br>power rating |
| DE: Electricity grid mix (catalyst calcination)<br>(MJ)          | 0.00932  | 0.00932  | 0.00932  | 0.00932  | Using instrument<br>power rating |
| DE: Tap water from groundwater (condenser<br>1) (kg)             | 0.155    | 0.155    | 0.155    | 0.155    | Using eqn (S25)                  |
| DE: Tap water from groundwater (condenser<br>2) (kg)             | 0.0518   | 0.0518   | 0.0518   | 0.0518   | Using eqn (S25)                  |
| DE: Diesel mix at refinery (bio-oil<br>transportation) (kg)      | 0.000138 | 0.000138 | 0.000138 | 0.000138 | Ecoinvent 3.8 <sup>a</sup>       |
| DE: Thermal energy from natural gas (bio-oil<br>combustion) (MJ) | 0.241    | 0.241    | 0.179    | 0.124    | Using eqn (S4)                   |
| GLO: Air (bio-oil combustion) (Nm <sup>3</sup> )                 | 0.419    | 0.419    | 0.419    | 0.419    | Using eqn (S2)                   |
| DE: Thermal energy from natural gas (NCG                         | -        | 0.0444   | 0.0444   | -        | Using eqn (S19)                  |

|                                                  |        |        |        |         |                                     |
|--------------------------------------------------|--------|--------|--------|---------|-------------------------------------|
| combustion) (MJ)                                 |        |        |        |         |                                     |
| GLO: Air (NCG combustion) (Nm <sup>3</sup> )     | -      | 0.0368 | 0.0368 | 0.0368  | Using eqn (S16)                     |
| GLO: Air (biochar combustion) (Nm <sup>3</sup> ) | -      | -      | 0.0918 | 0.206   | Using eqn (S8)                      |
| <b>Output</b>                                    |        |        |        |         |                                     |
| Biochar (kg)                                     | 0.0237 | -      | -      | -       | <sup>3</sup>                        |
| Non-condensable gases (NCG) (kg)                 | 0.0188 | -      | -      | -       | <sup>3</sup>                        |
| Off-gases (bio-oil combustion) (kg)              | 0.54   | 0.54   | 0.54   | 0.54    | Using eqn (S3)                      |
| Off-gases (NCG combustion) (kg)                  | -      | 0.0956 | 0.0956 | 0.0956  | Using eqn (S13-<br>15) and Table S1 |
| Off-gases (biochar combustion) (kg)              | -      | -      | 0.144  | 0.323   | Using eqn (S9)                      |
| Biochar to coal credit (kg)                      | -      | 0.0237 | 0.0142 | 0.00237 | Table 1                             |

<sup>a</sup> GLO, Truck (diesel driven), Euro 6, up to 7.5t gross weight and 2.7t payload capacity.

<sup>b</sup> EU-28, Alumina production 2015, production of smelter grade alumina, single route, at plant (3.94 g/cm<sup>3</sup>).

**Table S6** Ecoinvent 3.8 inventory datasets employed for non-catalytic and catalytic pyrolysis system

| Inventories                      | Inventory database names*                                                                                                                      |
|----------------------------------|------------------------------------------------------------------------------------------------------------------------------------------------|
| Diesel                           | DE   Diesel mix at refinery   from crude oil and bio components   production mix, at refinery   10 ppm sulfur, 6.19% bio components            |
| Truck                            | GLO   Truck (diesel driven), Euro 6   up to 7.5t gross weight, 2.7t payload capacity                                                           |
| Thermal energy from natural gas  | DE   Thermal energy from natural gas   technology mix regarding firing and flue gas cleaning   production mix, at plant heat   100% efficiency |
| Electricity                      | DE   Electricity grid mix   AC, technology mix   consumer mix, to consumer                                                                     |
| Alumina                          | EU-28   Alumina production 2015   production of smelter grade alumina   single route, at plant   3.94 g/cm <sup>3</sup>                        |
| Water (for catalyst preparation) | DE   Water (desalinated; deionised)   via ion exchange   single route, at plant   1000 kg/m <sup>3</sup> , 18 g/mol                            |
| Water (for condensation)         | DE   Tap water from groundwater   filtration, disinfection, ion removal, etc.   production mix, at plant   1000 kg/m <sup>3</sup> , 18 g/mol   |
| Air                              | GLO   Compressed air 7 bar (low power consumption)   7 bar, high efficiency   consumer mix, at plant   low electricity consumption             |

\*DE: Germany; GLO: Global; EU: European Union

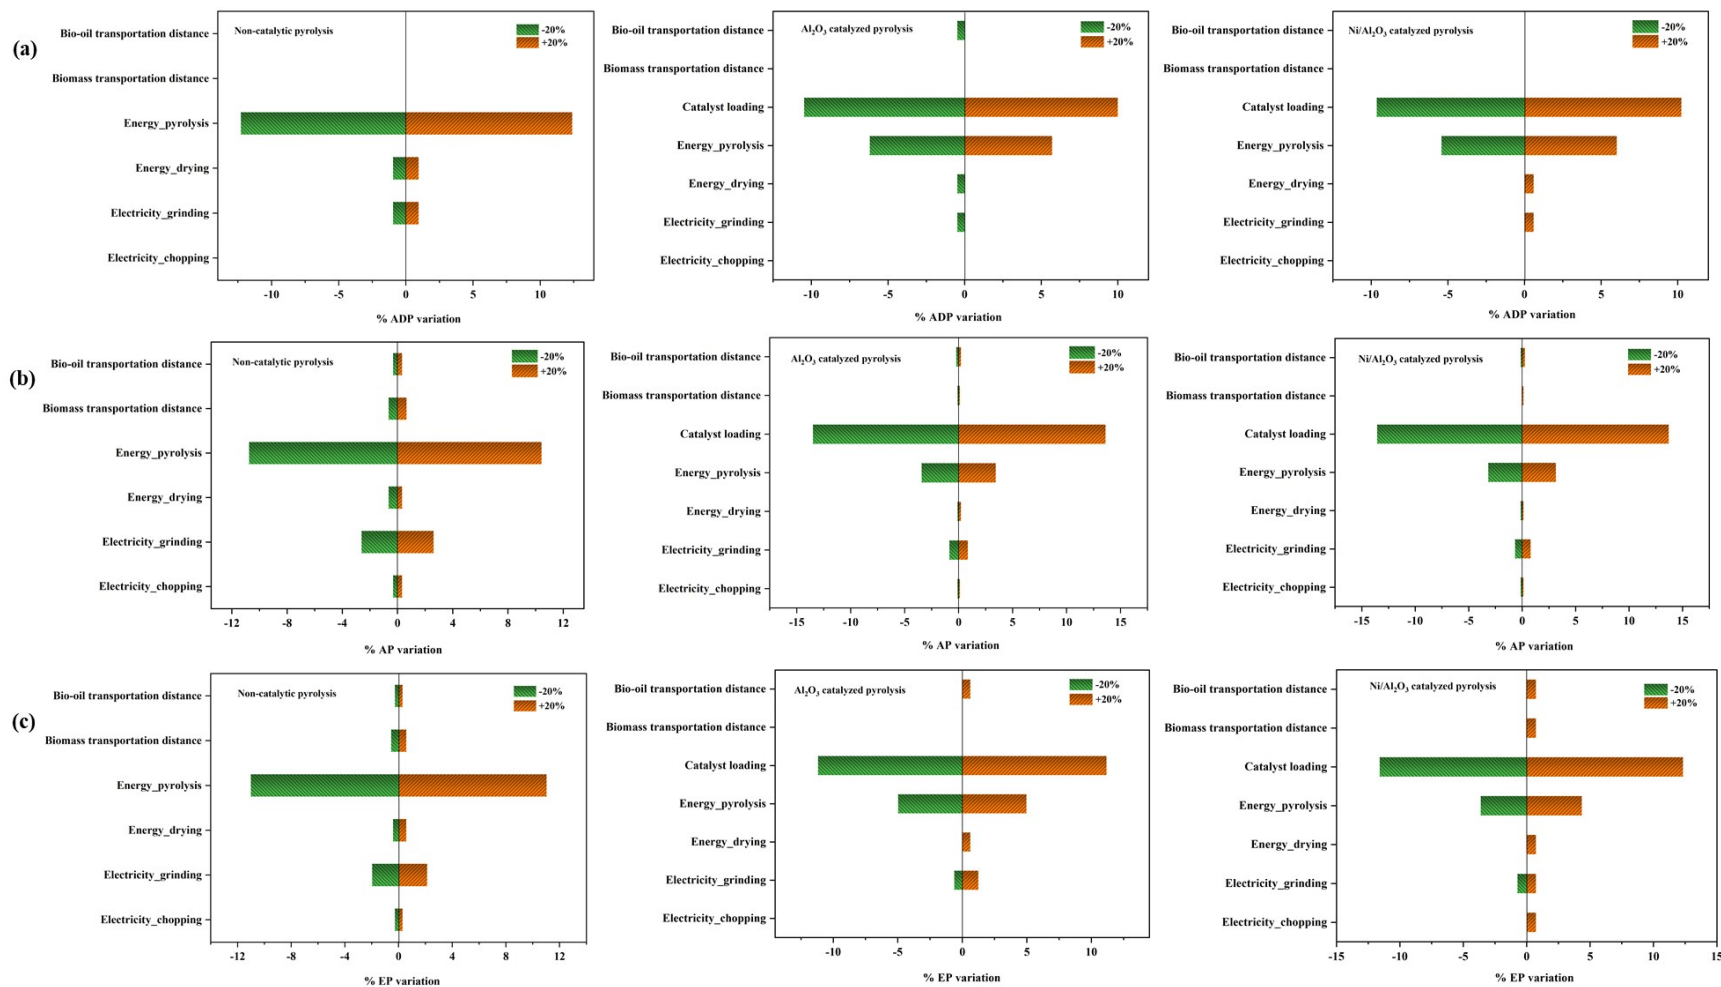

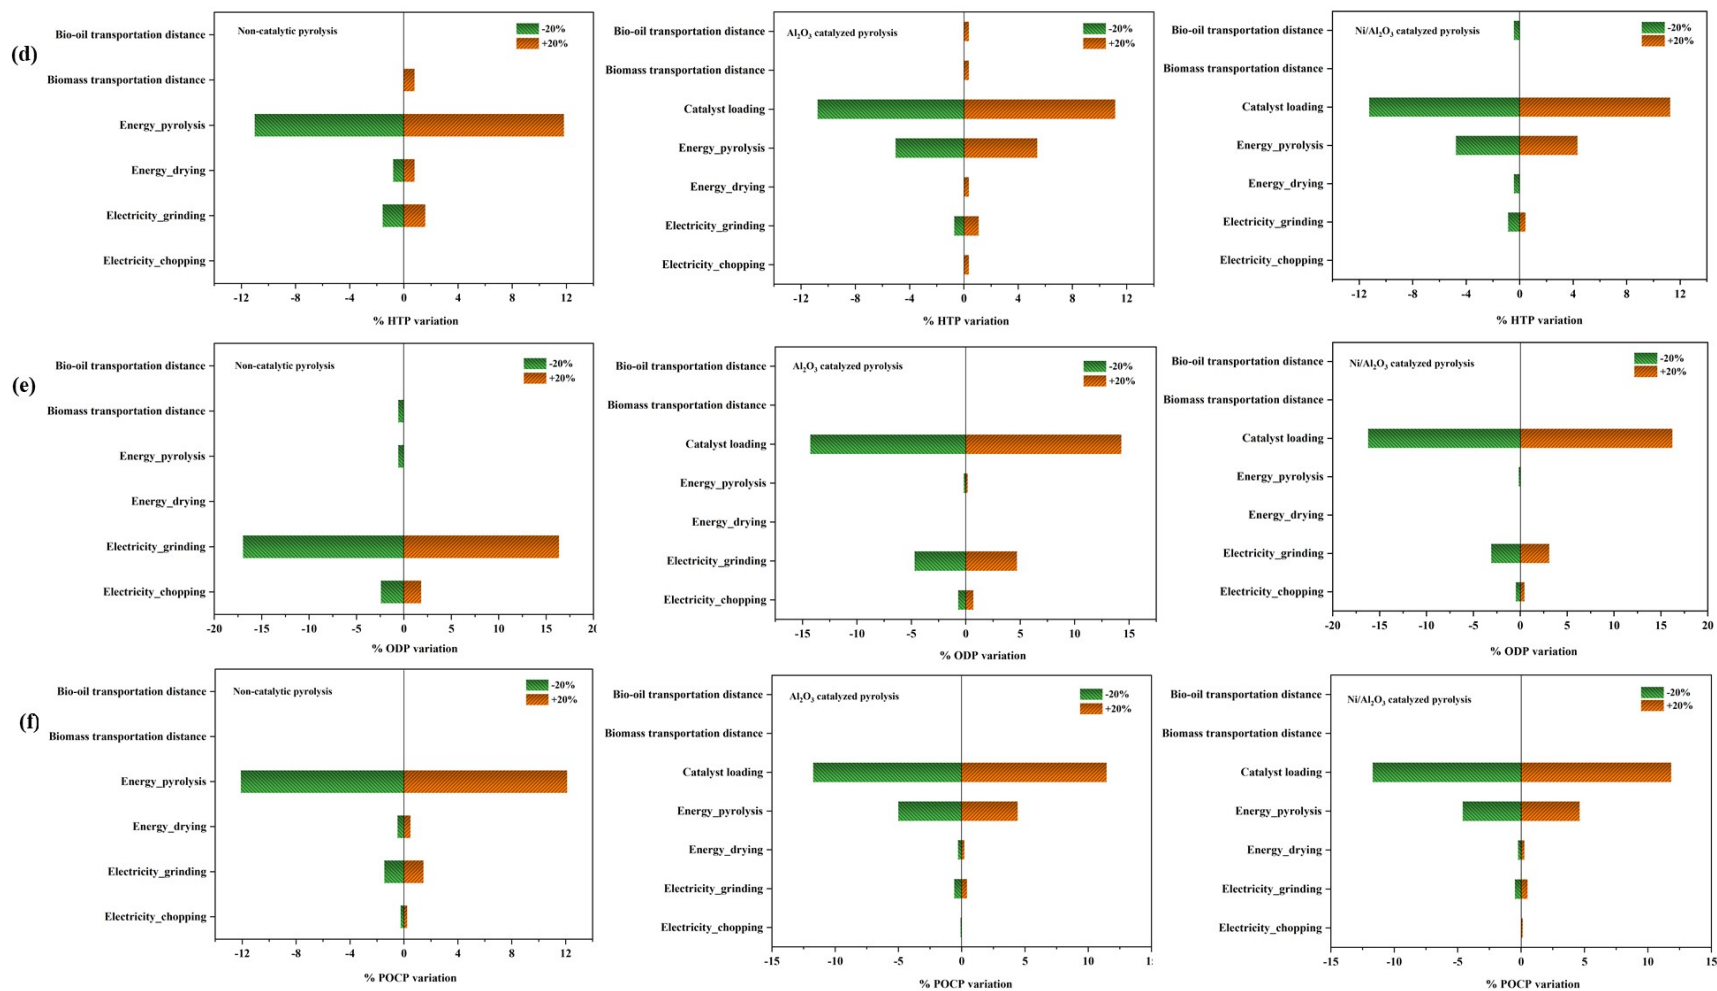

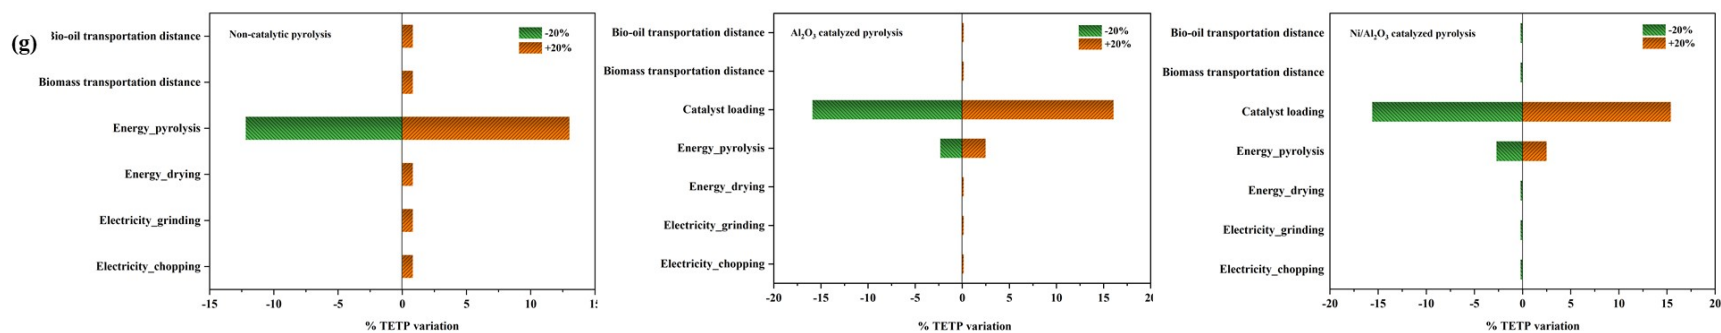

**Fig. S1.** Parameter sensitivity analysis in (a) ADP, (b) AP, (c) EP, (d) HTP, (e) ODP, (f) POCP and (g) TETP impact categories for non-catalytic,  $\text{Al}_2\text{O}_3$  and  $\text{Ni}/\text{Al}_2\text{O}_3$  catalyzed pyrolysis using CML 2001 – August 2016 method.

**Table S7** Impact of introducing two different energy mix databases (Germany and India) on the environmental metrics of non-catalytic pyrolysis as per CML 2001 – Aug 2016 method

|                          | <b>Sc 1</b>    |              | <b>Sc 2</b>    |              | <b>Sc 3</b>    |              | <b>Sc 4</b>    |              |
|--------------------------|----------------|--------------|----------------|--------------|----------------|--------------|----------------|--------------|
|                          | <b>Germany</b> | <b>India</b> | <b>Germany</b> | <b>India</b> | <b>Germany</b> | <b>India</b> | <b>Germany</b> | <b>India</b> |
| <b>ADP fossil</b>        | 1.05           | 1.12         | 0.057          | 0.13         | 0.12           | 0.17         | 0.19           | 0.23         |
| <b>AP</b>                | 3.07E-05       | 0.000166     | -6.68E-05      | 6.20E-05     | -3.63E-05      | 7.50E-05     | 1.78E-06       | 9.13E-05     |
| <b>EP</b>                | 7.08E-06       | 2.38E-05     | -7.41E-06      | 7.72E-06     | -3.65E-06      | 7.32E-06     | 1.05E-06       | 6.82E-06     |
| <b>FAETP inf.</b>        | 4.23E-05       | 4.49E-05     | -9.55E-06      | -6.95E-06    | 3.27E-06       | 5.96E-06     | 1.93E-05       | 2.21E-05     |
| <b>GWP</b>               | 0.061          | 0.069        | -0.033         | -0.026       | -0.014         | -0.0085      | 0.0089         | 0.013        |
| <b>HTP inf.</b>          | 0.0013         | 0.0032       | -0.0008        | 0.0012       | -0.00035       | 0.0016       | 0.00021        | 0.0022       |
| <b>MAETP inf.</b>        | 0.59           | 10.6         | -4.49          | 5.50         | -2.52          | 7.48         | -0.061         | 9.96         |
| <b>ODP, steady state</b> | 1.65E-16       | 3.75E-17     | 1.54E-16       | 2.74E-17     | 1.56E-16       | 3.08E-17     | 1.59E-16       | 3.49E-17     |
| <b>POCP</b>              | 4.13E-06       | 1.32E-05     | -4.73E-06      | 3.75E-06     | -2.49E-06      | 4.34E-06     | 3.02E-07       | 5.07E-06     |
| <b>TETP inf.</b>         | 0.00012        | 2.25E-05     | 6.01E-05       | -2.88E-05    | 4.62E-05       | -1.00E-05    | 2.88E-05       | 1.34E-05     |

**Table S8** Impact of introducing two different energy mix databases (Germany and India) on the environmental metrics of Al<sub>2</sub>O<sub>3</sub> catalyzed pyrolysis as per CML 2001 – Aug 2016 method

|                          | <b>Sc 1</b>    |              | <b>Sc 2</b>    |              | <b>Sc 3</b>    |              | <b>Sc 4</b>    |              |
|--------------------------|----------------|--------------|----------------|--------------|----------------|--------------|----------------|--------------|
|                          | <b>Germany</b> | <b>India</b> | <b>Germany</b> | <b>India</b> | <b>Germany</b> | <b>India</b> | <b>Germany</b> | <b>India</b> |
| <b>ADP fossil</b>        | 2.09           | 2.25         | 1.09           | 1.24         | 1.15           | 1.29         | 1.22           | 1.35         |
| <b>AP</b>                | 9.33E-05       | 0.00039      | -3.06E-06      | 0.00028      | 2.68E-05       | 0.00029      | 6.42E-05       | 0.00031      |
| <b>EP</b>                | 1.61E-05       | 4.95E-05     | 1.72E-06       | 3.32E-05     | 5.41E-06       | 3.28E-05     | 1.00E-05       | 3.23E-05     |
| <b>FAETP inf.</b>        | 8.96E-05       | 0.000108     | 3.80E-05       | 5.62E-05     | 5.06E-05       | 6.89E-05     | 6.63E-05       | 8.47E-05     |
| <b>GWP</b>               | 0.15           | 0.17         | 0.056          | 0.071        | 0.075          | 0.089        | 0.098          | 0.11         |
| <b>HTP inf.</b>          | 0.0028         | 0.0074       | 0.00072        | 0.0054       | 0.0011         | 0.0058       | 0.0017         | 0.0064       |
| <b>MAETP inf.</b>        | 1.79           | 25.31        | -3.20          | 20.32        | -1.27          | 22.26        | 1.14           | 24.69        |
| <b>ODP, steady state</b> | 5.74E-16       | 2.77E-16     | 5.64E-16       | 2.67E-16     | 5.66E-16       | 2.70E-16     | 5.68E-16       | 2.74E-16     |
| <b>POCP</b>              | 9.96E-06       | 2.90E-05     | 1.15E-06       | 1.94E-05     | 3.34E-06       | 2.00E-05     | 6.09E-06       | 2.07E-05     |
| <b>TETP inf.</b>         | 0.00060        | 0.00042      | 0.00054        | 0.00037      | 0.00052        | 0.00039      | 0.00051        | 0.00041      |



**Table S9** Impact of introducing two different energy mix databases (Germany and India) on the environmental metrics of Ni/Al<sub>2</sub>O<sub>3</sub> catalyzed pyrolysis as per CML 2001 – Aug 2016 method

|                          | <b>Sc 1</b>    |              | <b>Sc 2</b>    |              | <b>Sc 3</b>    |              | <b>Sc 4</b>    |              |
|--------------------------|----------------|--------------|----------------|--------------|----------------|--------------|----------------|--------------|
|                          | <b>Germany</b> | <b>India</b> | <b>Germany</b> | <b>India</b> | <b>Germany</b> | <b>India</b> | <b>Germany</b> | <b>India</b> |
| <b>ADP fossil</b>        | 1.66           | 1.82         | 0.87           | 1.03         | 0.91           | 1.06         | 0.97           | 1.11         |
| <b>AP</b>                | 7.59E-05       | 0.00039      | 1.63E-06       | 0.00031      | 2.45E-05       | 0.00032      | 5.31E-05       | 0.00033      |
| <b>EP</b>                | 1.38E-05       | 4.30E-05     | 2.69E-06       | 3.00E-05     | 5.51E-06       | 2.97E-05     | 9.04E-06       | 2.94E-05     |
| <b>FAETP inf.</b>        | 7.95E-05       | 0.00010      | 3.94E-05       | 6.53E-05     | 4.91E-05       | 7.50E-05     | 6.11E-05       | 8.71E-05     |
| <b>GWP</b>               | 0.12           | 0.13         | 0.045          | 0.060        | 0.059          | 0.074        | 0.076          | 0.089        |
| <b>HTP inf.</b>          | 0.0023         | 0.0083       | 0.00069        | 0.0067       | 0.0010         | 0.0070       | 0.0015         | 0.0075       |
| <b>MAETP inf.</b>        | 1.86           | 32.08        | -1.97          | 28.26        | -0.49          | 29.74        | 1.35           | 31.59        |
| <b>ODP, steady state</b> | 6.47E-16       | 2.69E-16     | 6.39E-16       | 2.61E-16     | 6.40E-16       | 2.64E-16     | 6.42E-16       | 2.67E-16     |
| <b>POCP</b>              | 8.03E-06       | 2.69E-05     | 1.21E-06       | 1.93E-05     | 2.89E-06       | 1.98E-05     | 4.98E-06       | 2.03E-05     |
| <b>TETP inf.</b>         | 0.00044        | 0.00031      | 0.00039        | 0.00028      | 0.00038        | 0.00029      | 0.00036        | 0.00031      |

## References:

- 1 H. Narayanan, *Ann. Discret. Math.*, 1997, **54**, 1–13.
- 2 S. Gupta, R. Lanjewar and P. Mondal, *Chemosphere*, 2022, **287**, 132220.
- 3 S. Gupta and P. Mondal, *J. Clean. Prod.*, 2021, **286**, 124930.
- 4 O. Winjobi, W. Zhou, D. Kulas, J. Nowicki and D. R. Shonnard, *ACS Sustain. Chem. Eng.*, 2017, **5**, 4541–4551.
- 5 S. Gupta, P. Patel and P. Mondal, *Fuel*, 2022, **310**, 122230.
- 6 M. Niu, Y. Huang, B. Jin and X. Wang, *Ind. Eng. Chem. Res.*, 2013, **52**, 14768–14775.
- 7 M. B. Shemfe, B. Fidalgo and S. Gu, *Chem. Eng. Res. Des.*, 2016, **107**, 73–80.
- 8 A. Kumar, R. Randa and A. Professor, *J. Eng. Res. Appl. www.ijera.com*, 2014, **4**, 122–130.
- 9 V. S. P. Bitra, A. R. Womac, C. Igathinathane, P. I. Miu, Y. T. Yang, D. R. Smith, N. Chevanan and S. Sokhansanj, *Bioresour. Technol.*, 2009, **100**, 6578–6585.
- 10 S. Mani, L. G. Tabil and S. Sokhansanj, *Biomass and Bioenergy*, 2004, **27**, 339–352.
- 11 H. Cong, O. Mašek, L. Zhao, Z. Yao, H. Meng, E. Hu and T. Ma, *Energy and Fuels*, 2018, **32**, 3743–3750.
- 12 J. Dong, Y. Tang, A. Nzihou, Y. Chi, E. Weiss-Hortala and M. Ni, *Sci. Total Environ.*, 2018, **626**, 744–753.
- 13 Y. Koderu, T. Yamamoto and E. Ishikawa, *Fuel Commun.*, 2021, **7**, 100016.
